# Supplementary material for: Injectable hydrogel-mediated combination of hyperthermia ablation and photo-enhanced chemotherapy in the NIR-II window for tumor eradication
Source: Royal Society of Chemistry journal article supplement (doi:10.1039/d1bm00371b), 2021-01-01
Supplement: d1bm00371b1.pdf [file d1bm00371b1.pdf]

## Supporting Information

# Injectable hydrogel-mediated combination of hyperthermia ablation and photo-enhanced chemotherapy in the NIR-II window for tumor eradication

Gang Wang<sup>a</sup>, Na Zhang<sup>a</sup>, Ziyang Cao<sup>b</sup>, Zhenghai Zhang<sup>b</sup>, Zhongming Zhu<sup>c,\*</sup>, Gengyun Sun<sup>a,\*</sup>, Liangjie Jin<sup>b,\*</sup>, Xianzhu Yang<sup>b</sup>

<sup>a</sup> Department of Respiratory and Critical Care Medicine, The First Affiliated Hospital of Anhui Medical University, Hefei, Anhui, 230022, China

<sup>b</sup> School of Medicine, South China University of Technology, Guangzhou, Guangdong 510006, China

<sup>c</sup> Respiratory Medicine, East District of the First Affiliated Hospital of Anhui Medical University, Hefei, Anhui 230022, China

**\*Corresponding Authors:** [mcjinlj@mail.scut.edu.cn](mailto:mcjinlj@mail.scut.edu.cn) (Liangjie Jin), [zhuzhongming@ahmu.edu.cn](mailto:zhuzhongming@ahmu.edu.cn) (Zhongming Zhu), [sungengy@126.com](mailto:sungengy@126.com) (Gengyun Sun).

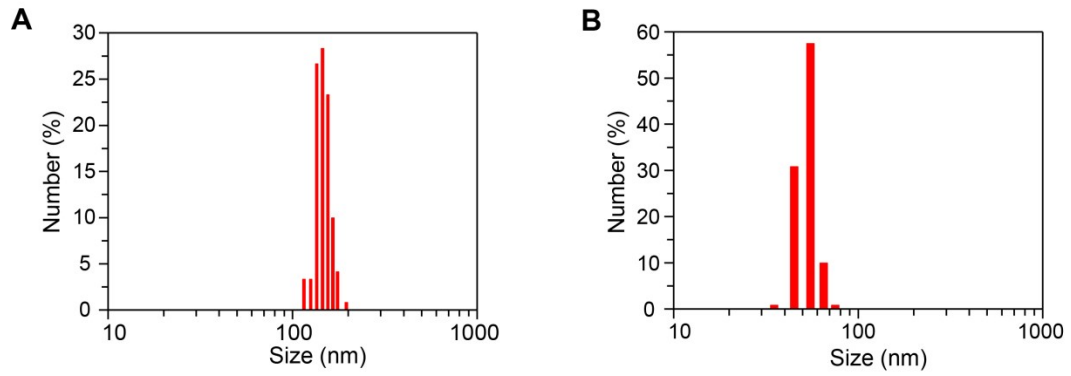

**Fig. S1.** The length (A) and diameter (B) of the synthesized Au/Ag NRs.

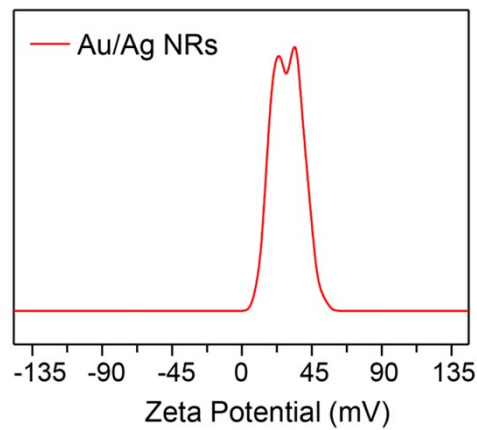

**Fig. S2.** The zeta-potential of the synthesized Au/Ag NRs.

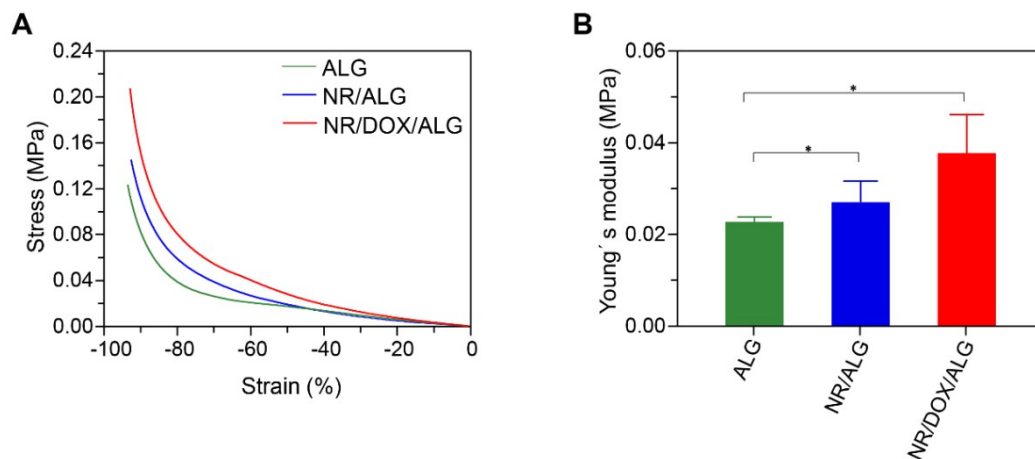

**Fig. S3.** Young's modulus of ALG gels formed with different formation. Data are presented as mean  $\pm$  SD ( $n = 3$ , mean  $\pm$  SD,  $*p < 0.05$ ).

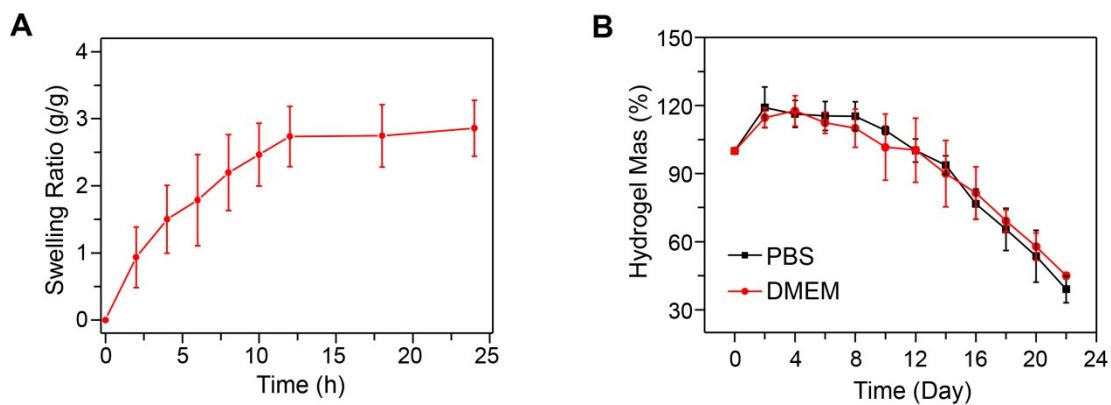

**Fig. S4.** The swelling ratio (A) and *in vitro* degradation (B) of NR/DOX/ALG hydrogels.

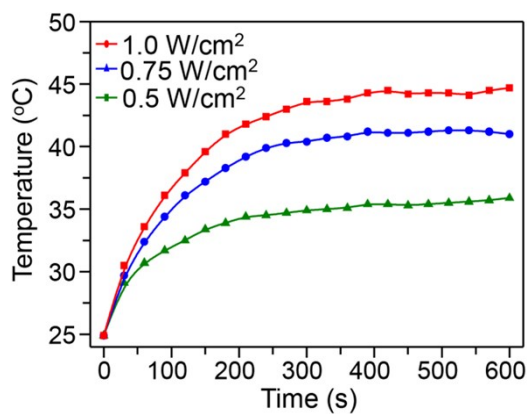

**Fig. S5.** Photothermal heating curves of Au/Ag NRs with different laser power upon 1064 nm laser irradiation (0.5, 0.75, 1.0 W/cm<sup>2</sup>).

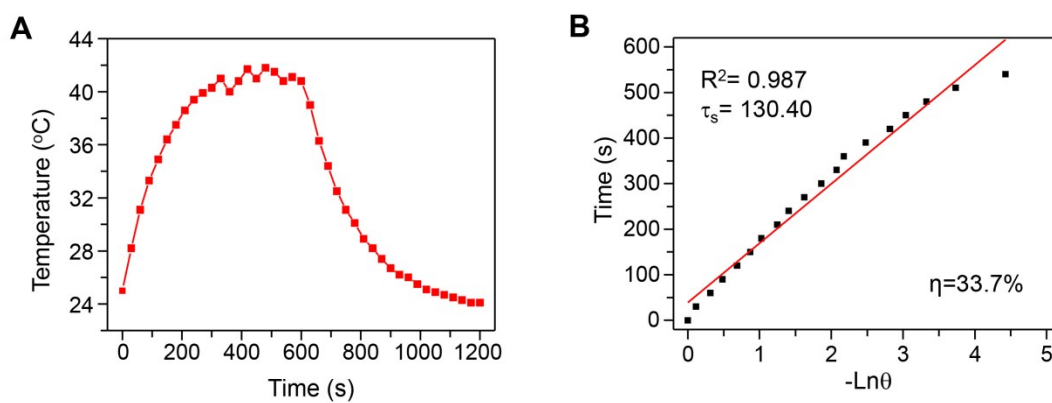

**Fig. S6.** The photothermal conversion efficiency ( $\eta$ ) of Au/Ag NRs.

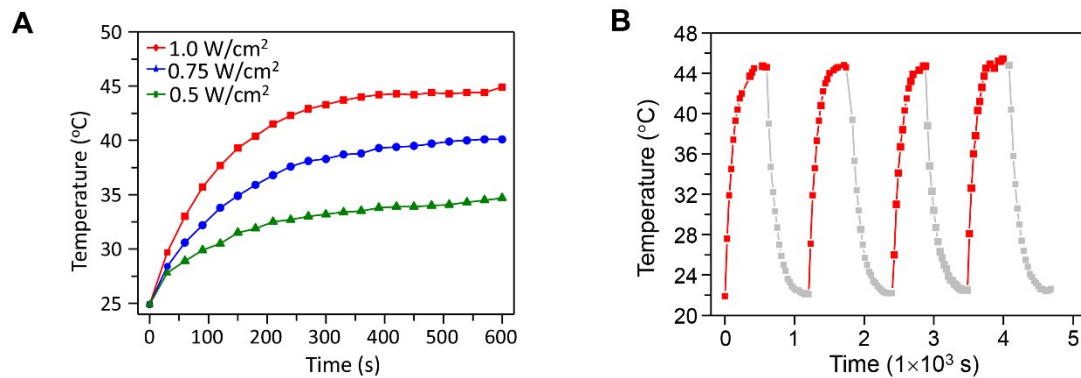

**Fig. S7.** Photothermal heating curves (A) of hydrogels with different laser power upon 1064 nm laser irradiation (0.5, 0.75, 1.0 W/cm<sup>2</sup>). (B) Temperature elevation of NR/DOX/ALG (Au/Ag NRs 5 μg) over four laser on/off cycles of NIR-II irradiation (1.0 W/cm<sup>2</sup>).

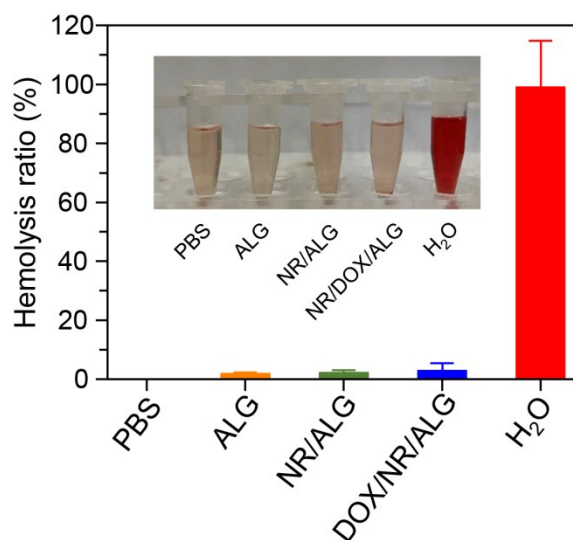

**Fig. S8.** Hemolytic ratio and photograph of RBC incubated with PBS, water, ALG, NR/ALG and NR/DOX/ALG.

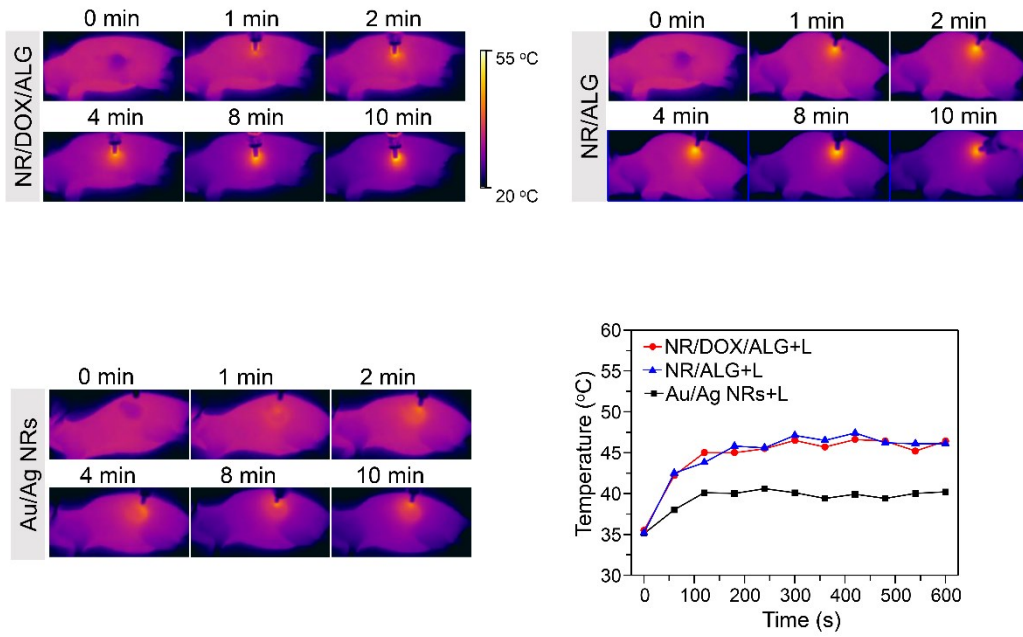

**Fig. S9.** IR imaging and temperature augmentation during laser illumination after 2 days injection of different materials.

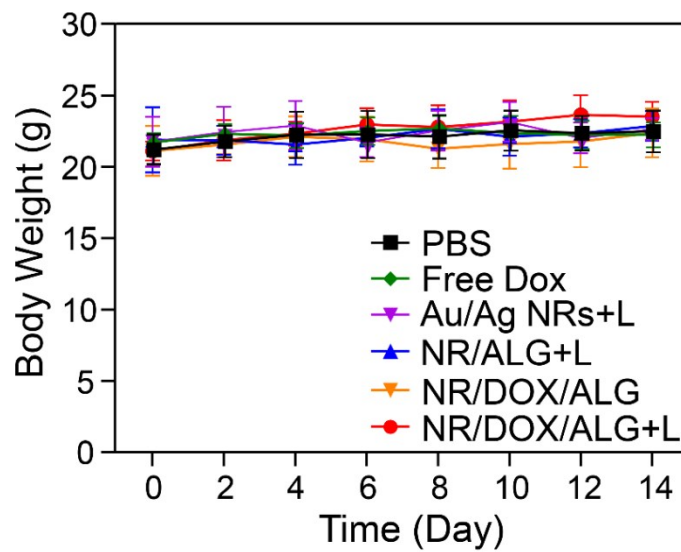

**Fig. S10.** Body weight of mice bearing A549 cancer xenografts after the administration of various treatments.
